# Supplementary material
Source: Elsevier journal article supplement (https://www.sciencedirect.com/science/article/pii/S1885585713002922)
Supplement: mmc1 [file mmc1.pdf]

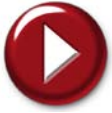

**Supplementary Material**

---

**Rationale and Design of PICNIC Study: Nutritional Intervention Program  
in Hospitalized Patients With Heart Failure Who Are Malnourished**

Antonio L. Gámez-López,<sup>a</sup> Juan L. Bonilla-Palomas,<sup>a,\*</sup> Manuel Anguita-Sánchez,<sup>b</sup>  
Mirian Moreno-Conde,<sup>c</sup> Cristina López-Ibáñez,<sup>c</sup> Rosa Alhambra-Expósito,<sup>d</sup>  
Juan C. Castillo-Domínguez,<sup>b</sup> Antonia Villar-Ráez,<sup>c</sup> and José Suárez de Lezo<sup>b</sup>

<sup>a</sup>*Sección de Cardiología, Servicio de Medicina Interna, Hospital San Juan de la Cruz, Úbeda, Jaén, Spain*

<sup>b</sup>*Servicio de Cardiología, Hospital Universitario Reina Sofía, Córdoba, Spain*

<sup>c</sup>*Servicio de Medicina Interna, Hospital San Juan de la Cruz, Úbeda, Jaén, Spain*

<sup>d</sup>*Servicio de Endocrinología y Nutrición, Hospital Universitario Reina Sofía, Córdoba, Spain*

---

## **MATERIAL SUPLEMENTARIO. REGISTRO DE VARIABLES BASALES DEL ESTUDIO PICNIC**

### **Variables demográficas y clínicas**

Edad (años)

Sexo

Antecedentes:

Hipertensión arterial

Hiperlipemia

Tabaquismo

Alcoholismo

Diabetes mellitus

Cardiopatía isquémica previa

Infarto de miocardio previo

Valvulopatía previa

Tipo de insuficiencia cardiaca aguda (crónica descompensada o de nueva aparición)

Tiempo de evolución aproximado de la insuficiencia cardiaca

Ingresos previos por insuficiencia cardiaca

Número de ingresos previos por insuficiencia cardiaca

Grado funcional (*New York Heart Association*)

Fracción de eyección del ventrículo izquierdo (%)

Ritmo (sinusal, fibrilación auricular/aleteo auricular)

Etiología de la insuficiencia cardiaca (isquémica, hipertensiva, valvulopatía, miocardiopatía dilatada idiopática/alcohólica, otras)

Portador de desfibrilador automático implantable

Terapia de resincronización cardiaca

### **Tratamiento farmacológico**

Diurético y tipo

Inhibidor de la enzima de conversión de la angiotensina/antagonista de los receptores de angiotensina II y tipo

Bloqueadores beta y tipo

Antialdosterónico y tipo

Digoxina

Antiagregante y tipo

Anticoagulante y tipo

Estatina y tipo

Nitratos

Antiarrítmicos y tipo

Ivabradina

### **Comorbilidad**

Puntuación del índice de Charlson

### **Variables bioquímicas**

Hemoglobina (g/dl)

Creatinina (mg/dl)

Sodio (mEq/l)

Proteína C reactiva (mg/dl)

Colesterol total (mg/dl)

Fracción colesterol unido a lipoproteínas de alta densidad (mg/dl)

Fracción colesterol unido a lipoproteínas de baja densidad (mg/dl)

Triglicéridos (mg/dl)

Proteínas totales (g/dl)

Albumina (g/dl)

Prealbúmina (mg/dl)

Transferrina (mg/dl)

Hierro ( $\mu$ g/dl)

Ferritina (ng/ml)

Número de linfocitos por  $\mu$ l

Fracción aminoterminal del propéptido natriurético cerebral (NTproBNP) (pg/ml)

Filtrado glomerular estimado por la fórmula MDRD7 (ml/min/1,73 m<sup>2</sup>)

### **Parámetros antropométricos**

Peso (kg)

Talla (cm)

Índice de masa corporal (kg/m<sup>2</sup>)

Pliegue tricípital (mm)

Perímetro del brazo (cm)

Perímetro muscular del brazo (cm)

### **Calidad de vida**

*Minnesota Living With Heart Failure Questionnaire (MLWHFQ)*

### **Mini Nutritional Assessment**

Bien nutrido

Riesgo de desnutrición

Desnutridos

### **Estudio basal de los nutrientes de la dieta (media de tres recordatorios de 24 horas)**

Energía (Kcal)

Energía (Kcal/kg de peso)

Carbohidratos (% del total diario de energía)

Carbohidratos (g)

Carbohidratos (g/kg de peso)

Grasas (% del total diario de energía)

Grasas (g):

Grasas (g/kg de peso)

Ácidos grasos saturados (% del total diario de energía)

Ácidos grasos poliinsaturados (% del total diario de energía)

Ácidos grasos • -3 (mg)

Ácidos grasos • -6 (g)

Ácidos grasos monoinsaturados (% del total diario de energía)

Colesterol

Proteínas (% del total diario de energía)

Proteínas (g)

Proteínas (g/kg de peso)

Fibra (g)

Fibra (g/kg de peso)

Sodio (mg)

Calcio (mg)

Fósforo (mg)

Zinc (mg)

Cobre ( $\mu\text{g}$ )

Yodo ( $\mu\text{g}$ )

Hierro (mg)

Magnesio (mg)

Potasio (mg)

Selenio ( $\mu\text{g}$ )

Flúor ( $\mu\text{g}$ )

Vitamina A ( $\mu\text{g}$ )

Tiamina (mg)

Riboflavina (mg)

Ácido nicotínico (mg)

Piridoxina (mg)

Biotina ( $\mu\text{g}$ )

Ácido fólico ( $\mu\text{g}$ )

Vitamina B12 ( $\mu\text{g}$ )

Vitamina C (mg)

Vitamina D ( $\mu\text{g}$ )

Vitamina E (mg)

•
